# Supplementary material for: Optimizing Systems for Cas9 Expression in Toxoplasma gondii
Source: PubMed Central journal article supplement (PMC6595152; doi:10.1128/msphere.00386-19), 2019-06-26

**Figure S1**

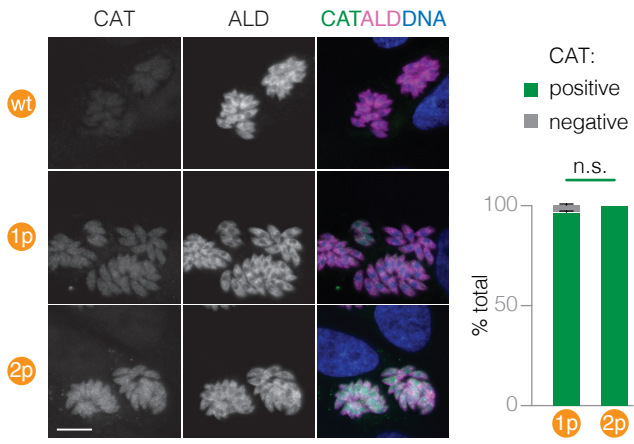

Supplement: mSphere.00386-19-sf001.pdf [file mSphere.00386-19-sf001.pdf]
