# Supplementary material for: Optimizing Systems for Cas9 Expression in Toxoplasma gondii
Source: PubMed Central journal article supplement (PMC6595152; doi:10.1128/msphere.00386-19), 2019-06-26

**Figure S2**

**A**

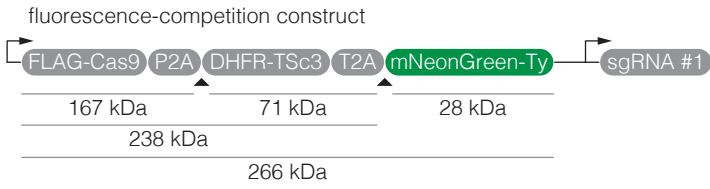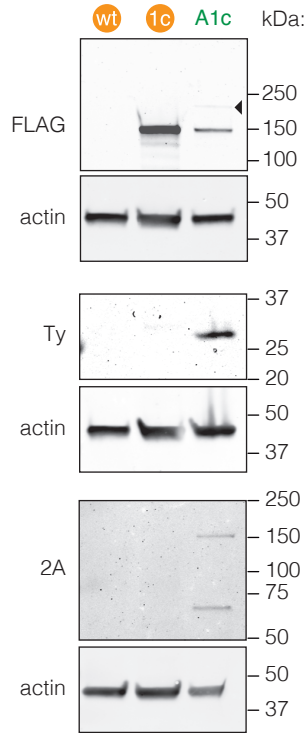

**B**

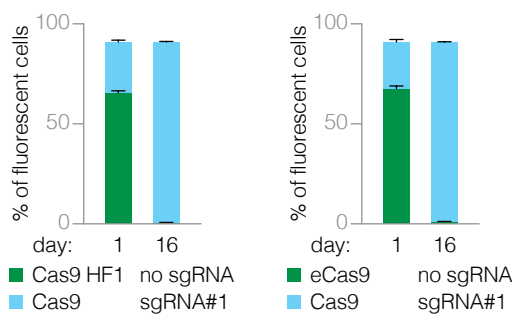

**C**

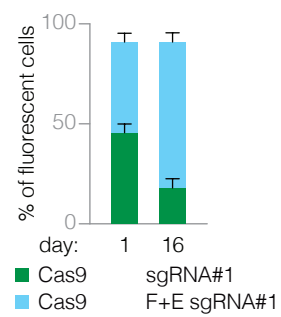

**D**

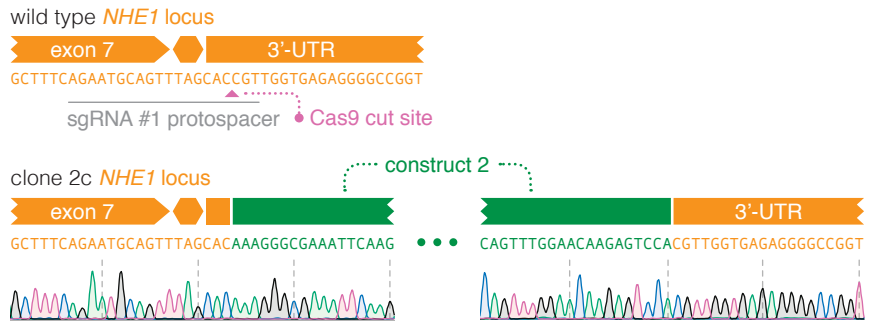

wild type *NHE1* locus

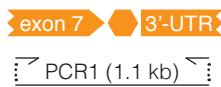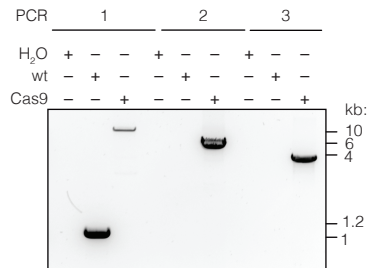

clone 2c *NHE1* locus

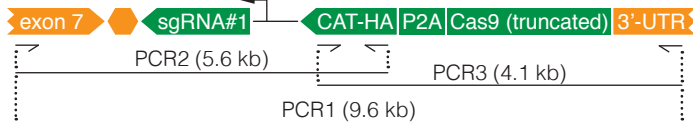

Supplement: mSphere.00386-19-sf002.pdf [file mSphere.00386-19-sf002.pdf]
