# Supplementary material for: Optimizing Systems for Cas9 Expression in Toxoplasma gondii
Source: PubMed Central journal article supplement (PMC6595152; doi:10.1128/msphere.00386-19), 2019-06-26
Supplement: mSphere.00386-19-st001.pdf [file mSphere.00386-19-st001.pdf]

**Table S1:** Plasmids used in this study

| plasmid name     | description                                                                                              | used in figures             | Addgene | GenBank  |
|------------------|----------------------------------------------------------------------------------------------------------|-----------------------------|---------|----------|
| pBM062           | used to generate Cas9-expressing cells (construct 1)                                                     | 1; S1                       | –       | MN019114 |
| pBM019           | used to generate Cas9-expressing cells (construct 2)                                                     | 1; S1; S2B                  | #128179 | MN019123 |
| pU6[sgSAG1]-DHFR | SAG 7-targeting sgRNA (Sidik et al., 2014 [5])                                                           | 1D, 3C, 4C                  | #80322  | –        |
| pBM006           | sgRNA #1 and Cas9; used for competitions                                                                 | 2A,B,I,H; 3A–D; 4A–E; S2A,D | –       | MN019111 |
| pBM013           | Cas9; used for competitions                                                                              | 2A,B; 3A–E; 4A–E            | –       | MN019124 |
| pBM020           | sgRNA #1 and dCas9; used for competitions                                                                | 2C,G                        | –       | MN019122 |
| pBM023           | dCas9; used for competitions                                                                             | 2C                          | –       | MN019121 |
| pBM040           | sgRNA #2 and Cas9; used for competitions                                                                 | 2F                          | –       | MN019117 |
| pBM025           | sgRNA #1 and Cas9; used for competitions                                                                 | 2F,G; S2C                   | –       | MN019120 |
| pBM041           | sgRNA #3 and Cas9; used for competitions                                                                 | 2I                          | –       | MN019116 |
| pBM042           | sgRNA #4 and Cas9; used for competitions                                                                 | 2I                          | –       | MN019115 |
| pBM064           | mRuby3 and sgRNA #1 (complementation construct);<br>used for competitions                                | 3E                          | –       | MN019113 |
| pBM065           | mRuby3 and a scrambled version of sgRNA #1<br>(complementation-control construct); used for competitions | 3E                          | –       | MN019112 |
| pBM027           | sgRNA #1 and eCas9                                                                                       | S2C                         | –       | MN019110 |
| pBM029           | sgRNA #1 and Cas9-HF1                                                                                    | S2C                         | –       | MN019118 |
| pBM026           | flip-extended sgRNA #1 (F+E sgRNA#1) and Cas9                                                            | S2D                         | –       | MN019119 |
