# Supplementary material for: Optimizing Systems for Cas9 Expression in Toxoplasma gondii
Source: PubMed Central journal article supplement (PMC6595152; doi:10.1128/msphere.00386-19), 2019-06-26
Supplement: mSphere.00386-19-st002.pdf [file mSphere.00386-19-st002.pdf]

**Table S2:** sgRNA protospacers

| sgRNA | target                                           | protospacer sequence  |
|-------|--------------------------------------------------|-----------------------|
| #1    | <i>NHE1</i> 3'-UTR                               | GAGAATGCAGTTTAGCACCGT |
| #2    | no predicted target in <i>T. gondii</i> GT1      | GTGAGTTAGCGTCGAACTCG  |
| #3    | intergenic region (chr. VI: 1,487,284–1,487,304) | GCCGTTCTGTCTCACGATGC  |
| #4    | intergenic region (chr. Ia: 1,462,133–1,462,153) | GATCGAGTCAGCTCAGATAT  |
