# Supplementary material for: Optimizing Systems for Cas9 Expression in Toxoplasma gondii
Source: PubMed Central journal article supplement (PMC6595152; doi:10.1128/msphere.00386-19), 2019-06-26
Supplement: mSphere.00386-19-st003.pdf [file mSphere.00386-19-st003.pdf]

**Table S3:** Chimerically-mapping sequencing reads between sgRNA<sup>+</sup> Cas9-expression construct and *T. gondii* genome (group A clones)

|               | contig A      | contig A coordinate | contig A strand | contig B      | contig B coordinate | contig B strand | CIGAR (contig A) | CIGAR (contig B) |
|---------------|---------------|---------------------|-----------------|---------------|---------------------|-----------------|------------------|------------------|
| clone A1c     | AAQM03000805  | 5576                | -               | pBM006        | 10623               | -               | 70S147M          | 70M147S          |
|               | pBM006        | 1762                | -               | TGGT1_chrVIIb | 3940177             | +               | 73S130M          | 130S73M          |
|               | pBM006        | 3617                | -               | TGGT1_chrXII  | 2563189             | -               | 86S212M          | 86M212S          |
|               | pBM006        | 526                 | -               | TGGT1_chrVIIb | 2842781             | +               | 189S92M19S       | 111S189M         |
|               | pBM006        | 526                 | -               | TGGT1_chrVIIb | 2842781             | +               | 123S92M          | 92S123M          |
|               | pBM006        | 526                 | -               | TGGT1_chrVIIb | 2842781             | +               | 127S88M          | 88S127M          |
|               | pBM006        | 526                 | -               | TGGT1_chrVIIb | 2842781             | +               | 170S83M          | 83S170M          |
|               | pBM006        | 8059                | -               | AAQM03000001  | 145                 | -               | 108S193M         | 108M193S         |
|               | TGGT1_chrlb   | 950047              | +               | pBM006        | 4444                | -               | 104M193S         | 193M104S         |
|               | TGGT1_chrlv   | 2264912             | -               | pBM006        | 1964                | -               | 103S197M         | 103M197S         |
|               | TGGT1_chrVIIb | 2842782             | -               | pBM006        | 525                 | +               | 30S178M          | 178S30M          |
|               | TGGT1_chrVIIb | 2842782             | -               | pBM006        | 525                 | +               | 71S145M          | 145S71M          |
|               | TGGT1_chrVIIb | 2842782             | -               | pBM006        | 525                 | +               | 45S189M          | 189S45M          |
|               | TGGT1_chrX    | 583086              | +               | pBM006        | 6495                | -               | 185M103S         | 103M185S         |
|               | clone A2c     | pBM006              | 11208           | +             | TGGT1_chrVIIb       | 2842782         | +                | 177M124S         |
| pBM006        |               | 6818                | +               | TGGT1_chrXI   | 3149611             | +               | 248M48S          | 248S48M          |
| pBM006        |               | 11209               | +               | TGGT1_chrVIIb | 2842783             | -               | 206M25S          | 25M206S          |
| pBM006        |               | 11209               | +               | TGGT1_chrVIIb | 2842783             | -               | 31M182S          | 182M31S          |
| pBM006        |               | 11208               | +               | TGGT1_chrVIIb | 2842782             | +               | 45M149S          | 45S149M          |
| pBM006        |               | 11208               | +               | TGGT1_chrVIIb | 2842782             | +               | 160M55S          | 160S55M          |
| pBM006        |               | 11208               | +               | TGGT1_chrVIIb | 2842782             | +               | 238M56S          | 238S56M          |
| pBM006        |               | 11208               | +               | TGGT1_chrVIIb | 2842782             | +               | 246M55S          | 246S55M          |
| TGGT1_chrVIIb |               | 2842783             | +               | pBM006        | 11209               | -               | 43M257S          | 257M43S          |
| pBM006        |               | 11208               | +               | TGGT1_chrVIIb | 2842782             | +               | 266M35S          | 266S35M          |
| pBM006        |               | 11209               | +               | TGGT1_chrVIIb | 2842783             | -               | 232M65S          | 65M232S          |
| pBM006        |               | 4892                | -               | TGGT1_chrX    | 4509421             | -               | 149S150M         | 149M150S         |
| pBM006        |               | 11208               | +               | TGGT1_chrVIIb | 2842782             | +               | 103M134S         | 103S134M         |
| pBM006        |               | 11208               | +               | TGGT1_chrVIIb | 2842782             | +               | 72M187S          | 72S187M          |
| TGGT1_chrX    |               | 574673              | +               | pBM006        | 10134               | +               | 108M80S          | 108S80M          |
| pBM006        |               | 11208               | +               | TGGT1_chrVIIb | 2842782             | +               | 140M156S         | 140S156M         |
| pBM006        |               | 7789                | +               | TGGT1_chrXII  | 4295071             | -               | 146M148S         | 148M146S         |
| pBM006        |               | 11209               | +               | TGGT1_chrVIIb | 2842783             | -               | 161M111S         | 111M161S         |
| TGGT1_chrVIIb |               | 2842783             | +               | pBM006        | 11209               | -               | 174M126S         | 126M174S         |
| TGGT1_chrVIIb |               | 2842783             | -               | pBM006        | 11209               | -               | 114S98M          | 114M98S          |
| TGGT1_chrVIIb | 2842783       | +                   | pBM006          | 11209         | -                   | 36M118S         | 118M36S          |                  |
| TGGT1_chrVIIb | 2842783       | +                   | pBM006          | 11209         | -                   | 145M154S        | 154M145S         |                  |
| pBM006        | 11208         | +                   | TGGT1_chrVIIb   | 2842782       | +                   | 258M43S         | 258S43M          |                  |
| pBM006        | 11209         | +                   | TGGT1_chrVIIb   | 2842783       | -                   | 105M117S        | 117M105S         |                  |
| pBM006        | 7247          | +                   | TGGT1_chrla     | 1490829       | -                   | 176M118S        | 118M176S         |                  |
| pBM006        | 11208         | +                   | TGGT1_chrVIIb   | 2842782       | +                   | 64M220S         | 64S220M          |                  |
| pBM006        | 11209         | +                   | TGGT1_chrVIIb   | 2842783       | -                   | 218M83S         | 83M218S          |                  |
| clone A3c     | AAQM03000805  | 5576                | -               | pBM006        | 10623               | -               | 70S147M          | 70M147S          |
|               | pBM006        | 526                 | -               | TGGT1_chrVIIb | 2842781             | +               | 189S92M19S       | 111S189M         |
|               | pBM006        | 4374                | -               | TGGT1_chrVIIb | 2580925             | +               | 204S95M          | 95S204M          |
|               | pBM006        | 526                 | -               | TGGT1_chrVIIb | 2842781             | +               | 179S29M          | 29S179M          |
|               | TGGT1_chrVIIb | 2842782             | -               | pBM006        | 525                 | +               | 107S192M         | 192S107M         |
|               | pBM006        | 526                 | -               | TGGT1_chrVIIb | 2842781             | +               | 123S92M          | 92S123M          |
|               | pBM006        | 5370                | +               | AAQM03000741  | 5460                | -               | 221M72S          | 72M221S          |
|               | pBM006        | 526                 | -               | TGGT1_chrVIIb | 2842781             | +               | 127S88M          | 88S127M          |
|               | pBM006        | 10622               | +               | AAQM03000805  | 5575                | +               | 168M131S         | 131M168S         |
|               | TGGT1_chrX    | 583086              | +               | pBM006        | 6495                | -               | 185M103S         | 103M185S         |
|               | pBM006        | 8059                | -               | AAQM03000001  | 145                 | -               | 108S193M         | 108M193S         |
|               | pBM006        | 1762                | -               | TGGT1_chrVIIb | 3940177             | +               | 73S130M          | 130S73M          |
|               | pBM006        | 526                 | -               | TGGT1_chrVIIb | 2842781             | +               | 146S70M          | 70S146M          |
|               | pBM006        | 3617                | -               | TGGT1_chrXII  | 2563189             | -               | 86S212M          | 86M212S          |
|               | pBM006        | 526                 | -               | TGGT1_chrVIIb | 2842781             | +               | 170S83M          | 83S170M          |
|               | TGGT1_chrVI   | 580409              | +               | pBM006        | 6125                | +               | 194M106S         | 106M194S         |
|               | pBM006        | 526                 | -               | TGGT1_chrVIIb | 2842781             | +               | 190S92M5S        | 97S190M          |
|               | pBM006        | 526                 | -               | TGGT1_chrVIIb | 2842781             | +               | 239S62M          | 62S239M          |
|               | TGGT1_chrVIIb | 2842782             | -               | pBM006        | 525                 | +               | 108S191M         | 191S108M         |
|               | pBM006        | 180                 | -               | TGGT1_chrVIII | 3081782             | +               | 56S224M          | 224S56M          |
|               | pBM006        | 1964                | +               | TGGT1_chrlv   | 2264912             | +               | 271M30S          | 30M271S          |
|               | pBM006        | 4444                | +               | TGGT1_chrlb   | 950047              | -               | 205M95S          | 95M205S          |
|               | pBM006        | 526                 | -               | TGGT1_chrVIIb | 2842781             | +               | 222S77M          | 77S222M          |
