# Supplementary material for: Optimizing Systems for Cas9 Expression in Toxoplasma gondii
Source: PubMed Central journal article supplement (PMC6595152; doi:10.1128/msphere.00386-19), 2019-06-26
Supplement: mSphere.00386-19-st004.pdf [file mSphere.00386-19-st004.pdf]

**Table S4:** Primers used to characterize the *NHE1* locus

| PCR  | forward primer       | reverse primer         |
|------|----------------------|------------------------|
| PCR1 | AGTTCCGTCTGTCACGGTTC | CGCTGGAACAACATGACGC    |
| PCR2 | AGTTCCGTCTGTCACGGTTC | GTGTTCACCCCTTGTTACACCG |
| PCR3 | CGTAACACGCCACATCTTGC | CGCTGGAACAACATGACGC    |
