# Supplementary material for: Optimizing Systems for Cas9 Expression in Toxoplasma gondii
Source: PubMed Central journal article supplement (PMC6595152; doi:10.1128/msphere.00386-19), 2019-06-26
Supplement: mSphere.00386-19-st005.pdf [file mSphere.00386-19-st005.pdf]

**Table S5:** Chimerically-mapping sequencing reads between sgRNA<sup>-</sup> Cas9-expression construct and *T. gondii* genome (group B clones)

|              | contig A      | contig A coordinate | contig A strand | contig B      | contig B coordinate | contig B strand | CIGAR (contig A) | CIGAR (contig B) |
|--------------|---------------|---------------------|-----------------|---------------|---------------------|-----------------|------------------|------------------|
| clone B1c    | pBM013        | 3410                | -               | TGGT1_chrVIIa | 2995119             | -               | 105S116M         | 105M116S         |
|              | pBM013        | 3407                | -               | TGGT1_chrVIIa | 2995116             | -               | 131S139M         | 131M139S         |
|              | pBM013        | 3407                | -               | TGGT1_chrVIIa | 2995116             | -               | 118S174M         | 118M174S         |
|              | pBM013        | 3407                | -               | TGGT1_chrVIIa | 2995116             | -               | 89S118M          | 89M118S          |
|              | pBM013        | 3407                | -               | TGGT1_chrVIIa | 2995116             | -               | 173S77M          | 173M77S          |
|              | pBM013        | 8662                | +               | AAQM03000886  | 5610                | -               | 150M143S         | 143M150S         |
|              | pBM013        | 1271                | -               | TGGT1_chrVIIa | 2995119             | +               | 254S32M6S        | 38S254M          |
|              | pBM013        | 3407                | -               | TGGT1_chrVIIa | 2995116             | -               | 55S245M          | 55M245S          |
|              | pBM013        | 3407                | -               | TGGT1_chrVIIa | 2995116             | -               | 209S91M          | 209M91S          |
|              | pBM013        | 3407                | -               | TGGT1_chrVIIa | 2995116             | -               | 88S178M          | 88M178S          |
|              | pBM013        | 3407                | -               | TGGT1_chrVIIa | 2995116             | -               | 114S168M         | 114M168S         |
|              | pBM013        | 1271                | -               | TGGT1_chrVIIa | 2995119             | +               | 157S32M4S        | 36S157M          |
|              | TGGT1_chrVIIa | 2995113             | +               | pBM013        | 3404                | +               | 121M138S         | 121S138M         |
|              | TGGT1_chrVIIa | 2995113             | +               | pBM013        | 3404                | +               | 94M190S          | 94S190M          |
|              | TGGT1_chrVIIa | 2995113             | +               | pBM013        | 3404                | +               | 91M208S          | 91S208M          |
|              | TGGT1_chrVIIa | 2995113             | +               | pBM013        | 3404                | +               | 30M210S          | 30S210M          |
|              | TGGT1_chrVIIa | 2995113             | +               | pBM013        | 3404                | +               | 87M213S          | 87S213M          |
|              | TGGT1_chrVIIa | 2995119             | +               | pBM013        | 1271                | +               | 45S183M          | 183S45M          |
|              | TGGT1_chrVIIa | 2995113             | +               | pBM013        | 3404                | +               | 81M138S          | 81S138M          |
|              | TGGT1_chrVIIa | 2995113             | +               | pBM013        | 3404                | +               | 99M200S          | 99S200M          |
| TGGT1_chrXI  | 4762075       | -                   | pBM013          | 7334          | +                   | 74S227M         | 227S74M          |                  |
| clone B2c    | pBM013        | 1473                | -               | TGGT1_chrVIIa | 598605              | +               | 53S228M          | 228S53M          |
|              | pBM013        | 10564               | +               | TGGT1_chrXII  | 364945              | -               | 180M70S          | 70M180S          |
|              | pBM013        | 502                 | -               | TGGT1_chrXII  | 364944              | +               | 175S116M10S      | 126S175M         |
|              | pBM013        | 502                 | -               | TGGT1_chrXII  | 364944              | +               | 134S66M          | 66S134M          |
|              | pBM013        | 502                 | -               | TGGT1_chrXII  | 364944              | +               | 165S79M          | 79S165M          |
|              | pBM013        | 502                 | -               | TGGT1_chrXII  | 364944              | +               | 231S42M          | 42S231M          |
|              | pBM013        | 10564               | +               | TGGT1_chrXII  | 364945              | -               | 103M161S         | 161M103S         |
|              | pBM013        | 502                 | -               | TGGT1_chrXII  | 364944              | +               | 198S98M          | 98S198M          |
|              | pBM013        | 502                 | -               | TGGT1_chrXII  | 364944              | +               | 269S32M          | 32S269M          |
|              | pBM013        | 10564               | +               | TGGT1_chrXII  | 364945              | -               | 109M76S          | 76M109S          |
|              | pBM013        | 502                 | -               | TGGT1_chrXII  | 364944              | +               | 202S71M          | 71S202M          |
|              | pBM013        | 502                 | -               | TGGT1_chrXII  | 364944              | +               | 209S85M          | 85S209M          |
|              | pBM013        | 10564               | +               | TGGT1_chrXII  | 364945              | -               | 172M128S         | 128M172S         |
|              | pBM013        | 10564               | +               | TGGT1_chrXII  | 364945              | -               | 83M211S          | 211M83S          |
|              | pBM013        | 502                 | -               | TGGT1_chrXII  | 364944              | +               | 28S114M          | 114S28M          |
|              | pBM013        | 7739                | +               | TGGT1_chrIV   | 916000              | -               | 232M68S          | 68M232M          |
|              | pBM013        | 10564               | +               | TGGT1_chrXII  | 364945              | -               | 130M169S         | 169M130S         |
|              | pBM013        | 10564               | +               | TGGT1_chrXII  | 364945              | -               | 147M80S          | 80M147S          |
|              | pBM013        | 502                 | -               | TGGT1_chrXII  | 364944              | +               | 200S85M          | 85S200M          |
|              | pBM013        | 502                 | -               | TGGT1_chrXII  | 364944              | +               | 213S37M          | 37S213M          |
|              | pBM013        | 10564               | +               | TGGT1_chrXII  | 364945              | -               | 65M153S          | 153M65S          |
|              | pBM013        | 9800                | -               | TGGT1_chrXI   | 1919806             | +               | 174S126M         | 126S174M         |
|              | pBM013        | 3359                | +               | AAQM03000794  | 8539                | -               | 198M102S         | 198S102M         |
|              | pBM013        | 10564               | +               | TGGT1_chrXII  | 364945              | -               | 171M89S          | 89M171S          |
|              | pBM013        | 1723                | +               | TGGT1_chrIX   | 2587497             | -               | 172M127S         | 127M172S         |
|              | pBM013        | 10564               | +               | TGGT1_chrXII  | 364945              | -               | 81M121S          | 121M81S          |
|              | TGGT1_chrIII  | 497829              | +               | pBM013        | 7616                | +               | 214M87S          | 214S87M          |
| TGGT1_chrXII | 364945        | +                   | pBM013          | 501           | +                   | 74S106M         | 106S74M          |                  |
| TGGT1_chrXII | 364940        | +                   | pBM013          | 10569         | -                   | 37M257S         | 257M37S          |                  |
| TGGT1_chrXII | 364945        | -                   | pBM013          | 501           | +                   | 74S201M         | 201S74M          |                  |
| clone B3c    | pBM013        | 4307                | +               | TGGT1_chrX    | 2720203             | +               | 116M170S         | 116S170M         |
|              | pBM013        | 486                 | +               | TGGT1_chrIX   | 3830920             | -               | 191M80S          | 80M191S          |
|              | pBM013        | 483                 | +               | TGGT1_chrIX   | 3830923             | -               | 159M86S          | 86M159S          |
|              | pBM013        | 10593               | -               | TGGT1_chrIX   | 3830919             | +               | 73S228M          | 228S73M          |
|              | pBM013        | 483                 | +               | TGGT1_chrIX   | 3830923             | -               | 149M97S          | 97M149S          |
|              | pBM013        | 483                 | +               | TGGT1_chrIX   | 3830923             | -               | 56M240S          | 240M56S          |
|              | pBM013        | 10593               | -               | TGGT1_chrIX   | 3830919             | +               | 75S224M          | 224S75M          |
|              | pBM013        | 483                 | +               | TGGT1_chrIX   | 3830923             | -               | 30M189S          | 189M30S          |
|              | pBM013        | 514                 | -               | TGGT1_chrX    | 2720201             | -               | 197S52M          | 197M52S          |
|              | pBM013        | 10593               | -               | TGGT1_chrIX   | 3830919             | +               | 32S222M          | 222S32M          |
|              | pBM013        | 5245                | +               | TGGT1_chrVIIb | 4563458             | -               | 52M223S          | 223M52S          |
|              | pBM013        | 3677                | +               | TGGT1_chrVIII | 5730294             | -               | 60M240S          | 240M60S          |
|              | pBM013        | 483                 | +               | TGGT1_chrIX   | 3830923             | -               | 186M115S         | 115M186S         |
|              | pBM013        | 10593               | -               | TGGT1_chrIX   | 3830919             | +               | 75S191M          | 191S75M          |
|              | pBM013        | 10593               | -               | TGGT1_chrIX   | 3830919             | +               | 151S121M         | 121S151M         |
|              | pBM013        | 10593               | -               | TGGT1_chrIX   | 3830919             | +               | 90S160M          | 160S90M          |
|              | pBM013        | 10593               | -               | TGGT1_chrIX   | 3830919             | +               | 207S59M          | 59S207M          |
|              | pBM013        | 483                 | +               | TGGT1_chrIX   | 3830923             | -               | 75M225S          | 225M75S          |
|              | pBM013        | 10593               | +               | TGGT1_chrIX   | 3830919             | +               | 185S47M          | 47S185M          |
|              | pBM013        | 483                 | +               | TGGT1_chrIX   | 3830923             | -               | 160M139S         | 139M160S         |
|              | pBM013        | 10593               | +               | TGGT1_chrIX   | 3830919             | +               | 82S218M          | 218S82M          |
|              | pBM013        | 10827               | +               | TGGT1_chrX    | 4575439             | +               | 136S165M         | 165S136M         |
|              | pBM013        | 483                 | +               | TGGT1_chrIX   | 3830923             | -               | 212M79S          | 79M212S          |
|              | pBM013        | 483                 | +               | TGGT1_chrIX   | 3830923             | -               | 115M108S         | 108M115S         |
|              | pBM013        | 10593               | +               | TGGT1_chrIX   | 3830919             | +               | 269S26M          | 26S269M          |
|              | pBM013        | 10080               | +               | TGGT1_chrVI   | 2411728             | +               | 163M127S         | 163S127M         |
|              | pBM013        | 483                 | +               | TGGT1_chrIX   | 3830923             | -               | 128M111S         | 111M128S         |
|              | pBM013        | 10593               | -               | TGGT1_chrIX   | 3830919             | +               | 86S199M          | 199S86M          |
|              | pBM013        | 10593               | -               | TGGT1_chrIX   | 3830919             | +               | 44S177M          | 177S44M          |
|              | pBM013        | 483                 | +               | TGGT1_chrIX   | 3830923             | -               | 66M218S          | 218M66S          |
|              | pBM013        | 483                 | +               | TGGT1_chrIX   | 3830923             | -               | 76M224S          | 20S204M76S       |
|              | pBM013        | 10593               | -               | TGGT1_chrIX   | 3830919             | +               | 104S92M          | 92S104M          |
|              | TGGT1_chrIX   | 3830923             | +               | pBM013        | 483                 | -               | 68M219S          | 219M68S          |
| TGGT1_chrIX  | 3830919       | -                   | pBM013          | 10593         | +                   | 190S88M         | 88S190M          |                  |
| TGGT1_chrIX  | 3830923       | +                   | pBM013          | 483           | -                   | 56M245S         | 245M56S          |                  |
| TGGT1_chrIX  | 3830923       | +                   | pBM013          | 483           | -                   | 60M239S         | 239M60S          |                  |
