# Supplementary material for: Optimizing Systems for Cas9 Expression in Toxoplasma gondii
Source: PubMed Central journal article supplement (PMC6595152; doi:10.1128/msphere.00386-19), 2019-06-26
Supplement: mSphere.00386-19-st006.pdf [file mSphere.00386-19-st006.pdf]

**Table S6:** SNVs identified in clones A1c–A3c and B1c–B3c

| assembly   | chromosome | coordinate | alleles | annotation   | comments                               | alternative allele frequencies |       |       |       |       |       |
|------------|------------|------------|---------|--------------|----------------------------------------|--------------------------------|-------|-------|-------|-------|-------|
|            |            |            |         |              |                                        | A1c                            | A2c   | A3c   | B1c   | B2c   | B3c   |
| TGGT1_v.39 | chr1a      | 1381322    | C/G     | TGGT1_295090 | Pro > Arg                              | 1.000                          | 0.000 | 0.000 | 0.000 | 0.000 | 0.000 |
| TGGT1_v.39 | chr1a      | 1798184    | G/C     | TGGT1_295340 | Glu > Asp                              | 0.000                          | 0.000 | 0.000 | 0.950 | 0.000 | 0.000 |
| TGGT1_v.39 | chr1a      | 482224     | A/G     | TGGT1_293660 | Trp > Arg                              | 0.950                          | 0.000 | 0.000 | 0.000 | 0.000 | 0.000 |
| TGGT1_v.39 | chr1b      | 126440     | T/G     | TGGT1_207480 | intronic                               | 0.000                          | 0.000 | 0.000 | 0.000 | 1.000 | 0.000 |
| TGGT1_v.39 | chr1ll     | 1742320    | G/A     | TGGT1_254470 | intronic                               | 0.000                          | 0.000 | 0.000 | 0.000 | 1.000 | 0.000 |
| TGGT1_v.39 | chr1ll     | 981220     | C/T     | intergenic   | read derived from expression construct | 0.608                          | 0.636 | 0.630 | 0.000 | 0.000 | 0.000 |
| TGGT1_v.39 | chr1ll     | 981292     | C/A     | intergenic   | read derived from expression construct | 0.500                          | 0.636 | 0.632 | 0.023 | 0.000 | 0.000 |
| TGGT1_v.39 | chrVIIIb   | 2347359    | T/C     | TGGT1_260310 | intronic                               | 0.000                          | 1.000 | 0.000 | 0.000 | 0.000 | 0.000 |
| TGGT1_v.39 | chrVIIb    | 2426986    | C/T     | TGGT1_260210 | intronic                               | 0.000                          | 0.000 | 1.000 | 0.000 | 0.000 | 0.000 |
| TGGT1_v.39 | chrVIIIb   | 3745777    | A/G     | intergenic   |                                        | 0.674                          | 0.148 | 0.394 | 0.442 | 0.373 | 0.425 |
| TGGT1_v.39 | chrVIII    | 3902027    | C/A     | intergenic   |                                        | 0.000                          | 1.000 | 0.000 | 0.000 | 0.000 | 0.000 |
| TGGT1_v.39 | chrVIII    | 4989894    | C/A     | intergenic   |                                        | 0.000                          | 0.033 | 1.000 | 0.000 | 0.000 | 0.000 |
| TGGT1_v.39 | chrVIII    | 6718028    | C/G     | intergenic   |                                        | 0.000                          | 0.000 | 0.000 | 0.000 | 1.000 | 0.000 |
| TGGT1_v.39 | chrVIII    | 910523     | T/C     | intergenic   |                                        | 0.000                          | 0.000 | 0.962 | 0.000 | 0.000 | 0.000 |
| TGGT1_v.39 | chrX       | 4530963    | T/A     | intergenic   |                                        | 0.532                          | 0.686 | 0.515 | 0.962 | 0.579 | 0.368 |
| TGGT1_v.39 | chrX       | 5487482    | G/C     | TGGT1_236930 | Ser > Trp                              | 1.000                          | 0.000 | 0.000 | 0.000 | 0.000 | 0.000 |
| TGGT1_v.39 | chrXI      | 2421184    | A/G     | intergenic   |                                        | 0.000                          | 0.000 | 1.000 | 0.000 | 0.000 | 0.000 |
| TGGT1_v.39 | chrXI      | 26152      | T/C     | intergenic   |                                        | 0.033                          | 0.462 | 0.179 | 0.271 | 0.306 | 0.318 |
| TGGT1_v.39 | chrXI      | 5681307    | C/T     | TGGT1_216970 | read derived from apicoplast genome    | 0.455                          | 0.000 | 0.241 | 0.034 | 0.292 | 0.083 |
| TGGT1_v.39 | chrXI      | 5681333    | C/T     | TGGT1_216970 | read derived from apicoplast genome    | 0.481                          | 0.000 | 0.300 | 0.065 | 0.400 | 0.120 |
| TGGT1_v.39 | chrXI      | 5681337    | G/A     | TGGT1_216970 | read derived from apicoplast genome    | 0.500                          | 0.000 | 0.286 | 0.065 | 0.400 | 0.111 |
| TGGT1_v.39 | chrXI      | 5681341    | C/A     | TGGT1_216970 | read derived from apicoplast genome    | 0.500                          | 0.000 | 0.308 | 0.065 | 0.400 | 0.111 |
| TGGT1_v.39 | chrXI      | 5681345    | C/A     | TGGT1_216970 | read derived from apicoplast genome    | 0.500                          | 0.000 | 0.300 | 0.067 | 0.423 | 0.111 |
| TGGT1_v.39 | chrXI      | 5681348    | G/A     | TGGT1_216970 | read derived from apicoplast genome    | 0.500                          | 0.000 | 0.300 | 0.067 | 0.385 | 0.111 |
| TGGT1_v.39 | chrXI      | 5681360    | C/T     | TGGT1_216970 | read derived from apicoplast genome    | 0.520                          | 0.000 | 0.286 | 0.067 | 0.345 | 0.103 |
| TGGT1_v.39 | chrXI      | 5681367    | C/T     | TGGT1_216970 | read derived from apicoplast genome    | 0.520                          | 0.000 | 0.310 | 0.065 | 0.310 | 0.107 |
| TGGT1_v.39 | chrXI      | 5681368    | C/T     | TGGT1_216970 | read derived from apicoplast genome    | 0.520                          | 0.000 | 0.310 | 0.065 | 0.310 | 0.111 |
| TGGT1_v.39 | chrXI      | 5681378    | G/A     | TGGT1_216970 | read derived from apicoplast genome    | 0.520                          | 0.000 | 0.293 | 0.063 | 0.286 | 0.125 |
| TGGT1_v.39 | chrXI      | 7948       | T/A     | intergenic   |                                        | 0.662                          | 0.964 | 0.606 | 0.596 | 0.500 | 0.623 |

Gray SNVs were called on the basis of erroneous read mapping.
